# Supplementary material for: Cavity-enhanced photoacoustic sensor based on a whispering-gallery-mode diode laser
Source: Copernicus journal article supplement (doi:10.5194/amt-12-1905-2019), 2019-03-25
Supplement: Supplementary file 1 [file amt-12-1905-2019-supplement.zip]

Archive with 6 entries (6 files):
- Figure 7(b).xlsx
- Figure 7(a).xlsx
- Figure 5.xlsx
- Figure 1.xlsx
- amt-12-1905-2019-supplement-title-page.pdf
- Figure 6.xlsx
