# Supplementary material for: Cavity-enhanced photoacoustic sensor based on a whispering-gallery-mode diode laser
Source: Copernicus journal article supplement (doi:10.5194/amt-12-1905-2019), 2019-03-25
Supplement: Supplementary file 1 [file amt-12-1905-2019-supplement.zip › Figure 1.xlsx]

## Sheet: Sheet1
-40	1529.97	1530.25	1530.54	1530.82	1531.1	1531.38	1531.67
-30	1529.97	1530.25	1530.53	1530.82	1531.1	1531.38	1531.66
-20	1529.97	1530.25	1530.53	1530.82	1531.1	1531.38	1531.66
-10	1529.97	1530.25	1530.53	1530.81	1531.1	1531.38	1531.66
0	1529.97	1530.25	1530.53	1530.81	1531.09	1531.38	1531.66
10	1529.96	1530.25	1530.53	1530.81	1531.09	1531.38	1531.66
20	1529.96	1530.25	1530.53	1530.81	1531.09	1531.37	1531.66
30	1529.96	1530.24	1530.53	1530.81	1531.09	1531.37	1531.65
40	1529.96	1530.24	1530.52	1530.81	1531.09	1531.37	1531.65
