# Supplementary material for: Cavity-enhanced photoacoustic sensor based on a whispering-gallery-mode diode laser
Source: Copernicus journal article supplement (doi:10.5194/amt-12-1905-2019), 2019-03-25
Supplement: Supplementary file 1 [file amt-12-1905-2019-supplement.zip › Figure 5.xlsx]

## Sheet: Sheet1
8e-07	-38.8	0.12	0.004
1.6e-06	-41.2	0.04	-0.002
2.4e-06	-39.6	0.12	0.004
3.2e-06	-41.2	0.04	-0.002
4e-06	-39.6	0.12	0.004
4.8e-06	-41.2	0.04	-0.002
5.6e-06	-38.8	0.12	0.004
6.4e-06	-41.2	0.04	-0.002
7.2e-06	-39.6	0.16	0.004
8e-06	-40.4	0.04	-0.002
8.8e-06	-39.6	0.16	0.004
9.6e-06	-41.2	0.04	-0.002
1.04e-05	-39.6	0.12	0.004
1.12e-05	-41.2	0.04	-0.002
1.2e-05	-39.6	0.12	0.004
1.28e-05	-41.2	0.04	-0.002
1.36e-05	-39.6	0.12	0.004
1.44e-05	-41.2	0.04	1.90735e-09
1.52e-05	-39.6	0.12	0.004
1.6e-05	-41.2	0.04	-0.002
1.68e-05	-39.6	0.12	0.004
1.76e-05	-41.2	0.04	-0.002
1.84e-05	-39.6	0.12	0.004
1.92e-05	-41.2	0.04	-0.002
2e-05	-39.6	0.12	0.004
2.08e-05	-41.2	0.04	-0.002
2.16e-05	-39.6	0.12	0.004
2.24e-05	-41.2	0.04	1.90735e-09
2.32e-05	-39.6	0.12	0.004
2.4e-05	-40.4	0.04	-0.002
2.48e-05	-39.6	0.12	0.004
2.56e-05	-41.2	0.04	-0.002
2.64e-05	-39.6	0.12	0.004
2.72e-05	-41.2	0.04	-0.002
2.8e-05	-39.6	0.12	0.006
2.88e-05	-41.2	0.04	-0.002
2.96e-05	-39.6	0.12	0.004
3.04e-05	-41.2	0.04	-0.002
3.12e-05	-38.8	0.12	0.004
3.2e-05	-41.2	0.04	-0.002
3.28e-05	-39.6	0.12	0.004
3.36e-05	-40.4	0.04	-0.002
3.44e-05	-39.6	0.12	0.004
3.52e-05	-41.2	0.04	-0.002
3.6e-05	-39.6	0.12	0.004
3.68e-05	-41.2	0.04	-0.002
3.76e-05	-39.6	0.12	0.004
3.84e-05	-41.2	0.04	-0.002
3.92e-05	-39.6	0.12	0.006
4e-05	-41.2	0.04	-0.002
4.08e-05	-39.6	0.12	0.004
4.16e-05	-41.2	0.04	-0.002
4.24e-05	-39.6	0.12	0.004
4.32e-05	-41.2	0.04	-0.002
4.4e-05	-39.6	0.12	0.004
4.48e-05	-41.2	0.04	-0.002
4.56e-05	-39.6	0.12	0.004
4.64e-05	-41.2	0.04	-0.002
4.72e-05	-39.6	0.12	0.004
4.8e-05	-41.2	0.04	1.90735e-09
4.88e-05	-39.6	0.12	0.004
4.96e-05	-41.2	0.04	-0.002
5.04e-05	-39.6	0.12	0.004
5.12e-05	-41.2	0.04	-0.002
5.2e-05	-39.6	0.12	0.004
5.28e-05	-41.2	0.04	-0.002
5.36e-05	-39.6	0.12	0.004
5.44e-05	-40.4	0.04	-0.002
5.52e-05	-39.6	0.12	0.004
5.6e-05	-40.4	0.04	-0.002
5.68e-05	-39.6	0.12	0.004
5.76e-05	-41.2	0.04	-0.002
5.84e-05	-39.6	0.12	0.004
5.92e-05	-41.2	0.04	-0.002
6e-05	-39.6	0.12	0.004
6.08e-05	-41.2	0.04	-0.002
6.16e-05	-38.8	0.12	0.004
6.24e-05	-40.4	0.04	-0.002
6.32e-05	-38.8	0.16	0.004
6.4e-05	-40.4	0.04	-0.002
6.48e-05	-39.6	0.12	0.006
6.56e-05	-40.4	0.04	-0.002
6.64e-05	-39.6	0.16	0.004
6.72e-05	-40.4	0.04	-0.002
6.8e-05	-39.6	0.12	0.004
6.88e-05	-41.2	0.04	-0.002
6.96e-05	-39.6	0.12	0.004
7.04e-05	-41.2	0.04	-0.002
7.12e-05	-39.6	0.12	0.004
7.2e-05	-40.4	0.04	1.90735e-09
7.28e-05	-38.8	0.12	0.004
7.36e-05	-41.2	0.04	-0.002
7.44e-05	-39.6	0.12	0.004
7.52e-05	-41.2	0.04	-0.002
7.6e-05	-38.8	0.12	0.004
7.68e-05	-41.2	0.04	-0.002
7.76e-05	-39.6	0.12	0.004
7.84e-05	-41.2	0.04	-0.002
7.92e-05	-38.8	0.12	0.004
8e-05	-41.2	0.04	-0.002
8.08e-05	-39.6	0.12	0.004
8.16e-05	-40.4	0.04	-0.002
8.24e-05	-39.6	0.12	0.004
8.32e-05	-41.2	0.04	-0.002
8.4e-05	-38.8	0.12	0.004
8.48e-05	-41.2	0.04	-0.002
8.56e-05	-39.6	0.12	0.004
8.64e-05	-41.2	0.04	-0.002
8.72e-05	-39.6	0.12	0.004
8.8e-05	-41.2	0.04	-0.002
8.88e-05	-38.8	0.12	0.004
8.96e-05	-41.2	0.04	-0.002
9.04e-05	-39.6	0.12	0.004
9.12e-05	-41.2	0.04	-0.002
9.2e-05	-39.6	0.12	0.004
9.28e-05	-41.2	0.04	-0.002
9.36e-05	-38.8	0.12	0.004
9.44e-05	-41.2	0.04	-0.002
9.52e-05	-39.6	0.12	0.004
9.6e-05	-41.2	0.04	-0.002
9.68e-05	-39.6	0.12	0.004
9.76e-05	-40.4	0.04	1.90735e-09
9.84e-05	-38.8	0.12	0.004
9.92e-05	-41.2	0.04	-0.002
0.0001	-39.6	0.12	0.004
0.0001008	-40.4	0.04	-0.002
0.0001016	-39.6	0.12	0.004
0.0001024	-40.4	0.04	-0.002
0.0001032	-39.6	0.12	0.004
0.000104	-40.4	0.04	-0.002
0.0001048	-38.8	0.12	0.004
0.0001056	-41.2	0.04	-0.002
0.0001064	-38.8	0.12	0.004
0.0001072	-41.2	0.04	-0.002
0.000108	-39.6	0.12	0.004
0.0001088	-41.2	0.04	-0.002
0.0001096	-39.6	0.12	0.004
0.0001104	-41.2	0.04	-0.002
0.0001112	-39.6	0.12	0.004
0.000112	-40.4	0.04	-0.002
0.0001128	-38.8	0.12	0.004
0.0001136	-41.2	0.04	-0.002
0.0001144	-39.6	0.12	0.004
0.0001152	-41.2	0.04	-0.002
0.000116	-39.6	0.12	0.004
0.0001168	-40.4	0.04	-0.002
0.0001176	-38.8	0.12	0.004
0.0001184	-40.4	0.04	-0.002
0.0001192	-38.8	0.12	0.004
0.00012	-41.2	0.04	-0.002
0.0001208	-38.8	0.12	0.004
0.0001216	-41.2	0.04	1.90735e-09
0.0001224	-39.6	0.12	0.004
0.0001232	-41.2	0.04	-0.002
0.000124	-39.6	0.12	0.004
0.0001248	-40.4	0.04	-0.002
0.0001256	-39.6	0.12	0.004
0.0001264	-40.4	0.04	-0.002
0.0001272	-39.6	0.12	0.004
0.000128	-40.4	0.04	-0.002
0.0001288	-38.8	0.12	0.004
0.0001296	-41.2	0.04	-0.002
0.0001304	-39.6	0.16	0.004
0.0001312	-40.4	0.04	-0.002
0.000132	-39.6	0.12	0.004
0.0001328	-40.4	0.04	-0.002
0.0001336	-39.6	0.12	0.004
0.0001344	-40.4	0.04	-0.002
0.0001352	-38.8	0.16	0.004
0.000136	-40.4	0.04	-0.002
0.0001368	-39.6	0.12	0.004
0.0001376	-40.4	0.04	-0.002
0.0001384	-38.8	0.12	0.004
0.0001392	-41.2	0.04	1.90735e-09
0.00014	-38.8	0.12	0.004
0.0001408	-41.2	0.04	-0.002
0.0001416	-39.6	0.16	0.004
0.0001424	-40.4	0.04	-0.002
0.0001432	-38.8	0.12	0.004
0.000144	-41.2	0.04	1.90735e-09
0.0001448	-39.6	0.12	0.004
0.0001456	-40.4	0.04	-0.002
0.0001464	-38.8	0.12	0.004
0.0001472	-40.4	0.04	-0.002
0.000148	-39.6	0.12	0.004
0.0001488	-40.4	0.04	-0.002
0.0001496	-38.8	0.12	0.004
0.0001504	-40.4	0.04	-0.002
0.0001512	-38.8	0.12	0.004
0.000152	-40.4	0.04	-0.002
0.0001528	-38.8	0.12	0.004
0.0001536	-40.4	0.04	-0.002
0.0001544	-38.8	0.12	0.004
0.0001552	-40.4	0.04	-0.002
0.000156	-38.8	0.12	0.004
0.0001568	-40.4	0.04	-0.002
0.0001576	-38.8	0.12	0.004
0.0001584	-40.4	0.04	-0.002
0.0001592	-38.8	0.12	0.004
0.00016	-40.4	0.04	-0.002
0.0001608	-39.6	0.12	0.004
0.0001616	-40.4	0.04	-0.002
0.0001624	-38.8	0.12	0.004
0.0001632	-41.2	0.04	-0.002
0.000164	-38.8	0.12	0.004
0.0001648	-40.4	0.04	-0.002
0.0001656	-38.8	0.12	0.004
0.0001664	-40.4	0.04	-0.002
0.0001672	-38.8	0.12	0.004
0.000168	-40.4	0.04	-0.002
0.0001688	-38.8	0.12	0.004
0.0001696	-40.4	0.04	-0.002
0.0001704	-38.8	0.16	0.004
0.0001712	-40.4	0.04	-0.002
0.000172	-38.8	0.12	0.004
0.0001728	-40.4	0.04	-0.002
0.0001736	-38.8	0.12	0.004
0.0001744	-40.4	0.04	-0.002
0.0001752	-38.8	0.12	0.004
0.000176	-40.4	0.04	-0.002
0.0001768	-38.8	0.12	0.004
0.0001776	-41.2	0.04	-0.002
0.0001784	-38.8	0.12	0.004
0.0001792	-41.2	0.04	-0.002
0.00018	-38.8	0.12	0.004
0.0001808	-40.4	0.04	-0.002
0.0001816	-38.8	0.12	0.004
0.0001824	-40.4	0.04	-0.002
0.0001832	-38.8	0.12	0.004
0.000184	-40.4	0.04	-0.002
0.0001848	-38.8	0.12	0.004
0.0001856	-40.4	0.04	-0.002
0.0001864	-39.6	0.12	0.004
0.0001872	-41.2	0.04	-0.002
0.000188	-38.8	0.12	0.004
0.0001888	-40.4	0.04	-0.002
0.0001896	-38.8	0.12	0.004
0.0001904	-40.4	0.04	-0.002
0.0001912	-39.6	0.12	0.004
0.000192	-40.4	0.04	-0.002
0.0001928	-38.8	0.12	0.004
0.0001936	-40.4	0.04	-0.002
0.0001944	-38.8	0.12	0.004
0.0001952	-40.4	0.04	-0.002
0.000196	-38.8	0.12	0.004
0.0001968	-40.4	0.04	-0.002
0.0001976	-38.8	0.12	0.004
0.0001984	-40.4	0.04	-0.002
0.0001992	-38.8	0.12	0.004
0.0002	-40.4	0.04	-0.002
0.0002008	-38.8	0.12	0.004
0.0002016	-40.4	0.04	-0.002
0.0002024	-38.8	0.12	0.004
0.0002032	-40.4	0.04	-0.002
0.000204	-38.8	0.12	0.004
0.0002048	-40.4	0.04	-0.002
0.0002056	-38.8	0.12	0.004
0.0002064	-40.4	0.04	-0.002
0.0002072	-38.8	0.12	0.004
0.000208	-40.4	0.04	-0.002
0.0002088	-38.8	0.12	0.004
0.0002096	-40.4	0.04	-0.002
0.0002104	-39.6	0.12	0.004
0.0002112	-40.4	0.04	-0.002
0.000212	-38.8	0.12	0.004
0.0002128	-40.4	0.04	-0.002
0.0002136	-38.8	0.12	0.004
0.0002144	-40.4	0.04	-0.002
0.0002152	-38.8	0.12	0.004
0.000216	-40.4	0.04	-0.002
0.0002168	-38.8	0.12	0.004
0.0002176	-40.4	0.04	-0.002
0.0002184	-38.8	0.12	0.004
0.0002192	-40.4	0.04	-0.002
0.00022	-38.8	0.12	0.004
0.0002208	-40.4	0.04	-0.002
0.0002216	-38.8	0.12	0.004
0.0002224	-40.4	0.04	-0.002
0.0002232	-38.8	0.12	0.004
0.000224	-41.2	0.04	-0.002
0.0002248	-38.8	0.12	0.004
0.0002256	-40.4	0.04	-0.002
0.0002264	-38.8	0.12	0.004
0.0002272	-40.4	0.04	-0.002
0.000228	-38.8	0.12	0.004
0.0002288	-40.4	0.04	-0.002
0.0002296	-38.8	0.12	0.004
0.0002304	-40.4	0.04	-0.002
0.0002312	-38.8	0.12	0.004
0.000232	-40.4	0.04	-0.002
0.0002328	-38.8	0.12	0.004
0.0002336	-40.4	0.04	-0.002
0.0002344	-38.8	0.12	0.004
0.0002352	-40.4	0.04	-0.002
0.000236	-38.8	0.12	0.004
0.0002368	-40.4	0.04	-0.002
0.0002376	-38.8	0.12	0.004
0.0002384	-40.4	0.04	-0.002
0.0002392	-38.8	0.12	0.004
0.00024	-40.4	0.04	-0.002
0.0002408	-38.8	0.12	0.004
0.0002416	-40.4	0.04	-0.002
0.0002424	-38.8	0.12	0.004
0.0002432	-40.4	0.04	-0.002
0.000244	-38.8	0.12	0.004
0.0002448	-40.4	0.04	-0.002
0.0002456	-38.8	0.12	0.004
0.0002464	-40.4	0.04	1.90735e-09
0.0002472	-38.8	0.12	0.004
0.000248	-40.4	0.04	-0.002
0.0002488	-38.8	0.12	0.004
0.0002496	-40.4	0.04	-0.002
0.0002504	-38.8	0.12	0.004
0.0002512	-40.4	0.04	-0.002
0.000252	-38.8	0.12	0.004
0.0002528	-40.4	0.04	-0.002
0.0002536	-38.8	0.12	0.004
0.0002544	-40.4	0.04	-0.002
0.0002552	-38.8	0.12	0.004
0.000256	-40.4	0.04	-0.002
0.0002568	-38.8	0.12	0.004
0.0002576	-40.4	0.04	-0.002
0.0002584	-38.8	0.12	0.004
0.0002592	-40.4	0.04	-0.002
0.00026	-38.8	0.12	0.004
0.0002608	-40.4	0.04	-0.002
0.0002616	-38.8	0.12	0.004
0.0002624	-40.4	0.04	-0.002
0.0002632	-38.8	0.16	0.004
0.000264	-40.4	0.04	-0.002
0.0002648	-38.8	0.12	0.004
0.0002656	-40.4	0.04	-0.002
0.0002664	-38.8	0.12	0.004
0.0002672	-40.4	0.04	-0.002
0.000268	-38.8	0.12	0.004
0.0002688	-40.4	0.04	-0.002
0.0002696	-38.8	0.12	0.004
0.0002704	-40.4	0.04	-0.002
0.0002712	-38.8	0.12	0.004
0.000272	-40.4	0.04	-0.002
0.0002728	-38.8	0.12	0.004
0.0002736	-40.4	0.04	-0.002
0.0002744	-38.8	0.12	0.004
0.0002752	-40.4	0.04	-0.002
0.000276	-38.8	0.12	0.004
0.0002768	-40.4	0.04	-0.002
0.0002776	-38.8	0.12	0.004
0.0002784	-40.4	0.04	-0.002
0.0002792	-38.8	0.12	0.004
0.00028	-40.4	0.04	-0.002
0.0002808	-38.8	0.12	0.004
0.0002816	-40.4	0.04	-0.002
0.0002824	-38.8	0.16	0.004
0.0002832	-40.4	0.04	-0.002
0.000284	-38.8	0.16	0.004
0.0002848	-40.4	0.04	-0.002
0.0002856	-38.8	0.12	0.004
0.0002864	-40.4	0.04	-0.002
0.0002872	-38.8	0.12	0.004
0.000288	-40.4	0.04	-0.002
0.0002888	-38.8	0.12	0.004
0.0002896	-40.4	0.04	-0.002
0.0002904	-38.8	0.12	0.004
0.0002912	-40.4	0.04	-0.002
0.000292	-38.8	0.12	0.004
0.0002928	-40.4	0.04	-0.002
0.0002936	-38.8	0.12	0.004
0.0002944	-40.4	0.04	-0.002
0.0002952	-38.8	0.12	0.004
0.000296	-40.4	0.04	-0.002
0.0002968	-38.8	0.12	0.004
0.0002976	-40.4	0.04	-0.002
0.0002984	-38.8	0.12	0.004
0.0002992	-40.4	0	-0.002
0.0003	-38.8	0.12	0.004
0.0003008	-40.4	0.04	-0.002
0.0003016	-38.8	0.12	0.004
0.0003024	-40.4	0.04	-0.002
0.0003032	-38.8	0.12	0.004
0.000304	-40.4	0.04	-0.002
0.0003048	-38.8	0.16	0.004
0.0003056	-40.4	0.04	-0.002
0.0003064	-38.8	0.12	0.004
0.0003072	-40.4	0.04	-0.002
0.000308	-38.8	0.12	0.004
0.0003088	-40.4	0.04	-0.002
0.0003096	-38.8	0.12	0.004
0.0003104	-40.4	0.04	-0.002
0.0003112	-38.8	0.12	0.004
0.000312	-40.4	0.04	-0.002
0.0003128	-38.8	0.12	0.004
0.0003136	-40.4	0.04	-0.002
0.0003144	-38.8	0.12	0.004
0.0003152	-40.4	0.04	-0.002
0.000316	-38.8	0.12	0.004
0.0003168	-40.4	0.04	-0.002
0.0003176	-38.8	0.12	0.004
0.0003184	-40.4	0.04	-0.002
0.0003192	-38.8	0.12	0.004
0.00032	-40.4	0.04	-0.002
0.0003208	-38.8	0.12	0.004
0.0003216	-40.4	0.04	-0.002
0.0003224	-38.8	0.12	0.004
0.0003232	-40.4	0.04	-0.002
0.000324	-38.8	0.12	0.004
0.0003248	-40.4	0.04	-0.002
0.0003256	-38.8	0.16	0.004
0.0003264	-40.4	0.04	-0.002
0.0003272	-38.8	0.12	0.004
0.000328	-40.4	0.04	-0.002
0.0003288	-38.8	0.16	0.004
0.0003296	-40.4	0.04	-0.002
0.0003304	-38.8	0.12	0.004
0.0003312	-40.4	0.04	-0.002
0.000332	-38.8	0.16	0.004
0.0003328	-40.4	0.04	-0.002
0.0003336	-38.8	0.12	0.004
0.0003344	-40.4	0.04	-0.004
0.0003352	-38.8	0.12	0.004
0.000336	-40.4	0.04	-0.002
0.0003368	-38.8	0.12	0.004
0.0003376	-40.4	0.04	-0.002
0.0003384	-38.8	0.12	0.004
0.0003392	-40.4	0.04	-0.002
0.00034	-38.8	0.12	0.004
0.0003408	-40.4	0.04	-0.002
0.0003416	-38.8	0.12	0.004
0.0003424	-40.4	0.04	-0.002
0.0003432	-38.8	0.12	0.004
0.000344	-40.4	0.04	-0.002
0.0003448	-38.8	0.12	0.004
0.0003456	-40.4	0.04	-0.002
0.0003464	-38.8	0.12	0.004
0.0003472	-40.4	0.04	-0.002
0.000348	-38.8	0.12	0.004
0.0003488	-40.4	0.04	-0.002
0.0003496	-38.8	0.12	0.004
0.0003504	-40.4	0.04	-0.002
0.0003512	-38.8	0.12	0.004
0.000352	-40.4	0.04	-0.002
0.0003528	-38.8	0.12	0.004
0.0003536	-40.4	0.04	-0.002
0.0003544	-38.8	0.12	0.004
0.0003552	-40.4	0.04	-0.002
0.000356	-38.8	0.12	0.004
0.0003568	-40.4	0.04	-0.002
0.0003576	-38.8	0.12	0.004
0.0003584	-40.4	0.04	-0.002
0.0003592	-38.8	0.12	0.004
0.00036	-40.4	0.04	-0.002
0.0003608	-38.8	0.12	0.004
0.0003616	-40.4	0.04	-0.002
0.0003624	-38.8	0.12	0.004
0.0003632	-40.4	0.04	-0.002
0.000364	-38.8	0.12	0.006
0.0003648	-40.4	0.04	-0.002
0.0003656	-38.8	0.12	0.004
0.0003664	-40.4	0.04	-0.002
0.0003672	-38.8	0.12	0.004
0.000368	-40.4	0.04	-0.002
0.0003688	-38.8	0.12	0.004
0.0003696	-40.4	0.04	-0.002
0.0003704	-38.8	0.12	0.004
0.0003712	-40.4	0.04	-0.002
0.000372	-38.8	0.12	0.004
0.0003728	-40.4	0.04	-0.002
0.0003736	-38.8	0.16	0.004
0.0003744	-40.4	0.04	-0.002
0.0003752	-38.8	0.12	0.002
0.000376	-40.4	0.04	-0.002
0.0003768	-38.8	0.12	0.004
0.0003776	-40.4	0.04	-0.002
0.0003784	-38.8	0.12	0.002
0.0003792	-40.4	0.04	-0.002
0.00038	-38.8	0.12	0.004
0.0003808	-40.4	0.04	-0.002
0.0003816	-38.8	0.12	0.004
0.0003824	-40.4	0.04	-0.002
0.0003832	-38.8	0.12	0.004
0.000384	-40.4	0.04	-0.002
0.0003848	-38.8	0.12	0.004
0.0003856	-40.4	0.04	-0.002
0.0003864	-38.8	0.12	0.004
0.0003872	-40.4	0.04	-0.002
0.000388	-38.8	0.12	0.002
0.0003888	-40.4	0.04	-0.002
0.0003896	-38.8	0.12	0.004
0.0003904	-40.4	0.04	-0.002
0.0003912	-38.8	0.12	0.004
0.000392	-40.4	0.04	-0.002
0.0003928	-38.8	0.12	0.004
0.0003936	-40.4	0.04	-0.002
0.0003944	-38.8	0.12	0.004
0.0003952	-40.4	0.04	-0.002
0.000396	-38.8	0.12	0.004
0.0003968	-40.4	0.04	-0.002
0.0003976	-38.8	0.12	0.004
0.0003984	-40.4	0.04	-0.002
0.0003992	-38.8	0.12	0.004
0.0004	-40.4	0.04	-0.002
0.0004008	-38.8	0.12	0.004
0.0004016	-40.4	0.04	-0.002
0.0004024	-38.8	0.12	0.004
0.0004032	-40.4	0.04	-0.002
0.000404	-38.8	0.12	0.004
0.0004048	-40.4	0.04	-0.002
0.0004056	-38.8	0.12	0.004
0.0004064	-40.4	0.04	-0.002
0.0004072	-38.8	0.12	0.004
0.000408	-40.4	0.04	-0.002
0.0004088	-38.8	0.12	0.004
0.0004096	-40.4	0.04	-0.002
0.0004104	-38.8	0.12	0.004
0.0004112	-40.4	0.04	-0.002
0.000412	-38.8	0.12	0.004
0.0004128	-40.4	0.04	-0.002
0.0004136	-38.8	0.12	0.004
0.0004144	-40.4	0.04	-0.002
0.0004152	-38.8	0.12	0.004
0.000416	-40.4	0.04	-0.002
0.0004168	-38.8	0.12	0.004
0.0004176	-40.4	0.04	-0.002
0.0004184	-38.8	0.12	0.004
0.0004192	-40.4	0.04	-0.002
0.00042	-38.8	0.12	0.004
0.0004208	-40.4	0.04	-0.002
0.0004216	-38.8	0.12	0.004
0.0004224	-40.4	0.04	-0.002
0.0004232	-38.8	0.12	0.004
0.000424	-40.4	0.04	-0.002
0.0004248	-38.8	0.12	0.002
0.0004256	-40.4	0.04	-0.002
0.0004264	-38.8	0.12	0.004
0.0004272	-40.4	0.04	-0.002
0.000428	-38.8	0.12	0.004
0.0004288	-40.4	0.04	-0.002
0.0004296	-38.8	0.12	0.004
0.0004304	-40.4	0.04	-0.002
0.0004312	-38.8	0.12	0.004
0.000432	-40.4	0.04	-0.002
0.0004328	-38.8	0.12	0.002
0.0004336	-40.4	0.04	-0.004
0.0004344	-38.8	0.16	0.004
0.0004352	-40.4	0.04	-0.002
0.000436	-38.8	0.12	0.002
0.0004368	-40.4	0.04	-0.002
0.0004376	-38.8	0.12	0.002
0.0004384	-40.4	0.04	-0.002
0.0004392	-38.8	0.12	0.004
0.00044	-40.4	0.04	-0.002
0.0004408	-38.8	0.12	0.004
0.0004416	-40.4	0.04	-0.002
0.0004424	-38.8	0.12	0.004
0.0004432	-40.4	0.04	-0.002
0.000444	-38.8	0.12	0.004
0.0004448	-40.4	0.04	-0.002
0.0004456	-38.8	0.12	0.004
0.0004464	-40.4	0.04	-0.002
0.0004472	-38.8	0.12	0.004
0.000448	-40.4	0.04	-0.002
0.0004488	-38.8	0.12	0.004
0.0004496	-40.4	0.04	-0.002
0.0004504	-38.8	0.12	0.004
0.0004512	-40.4	0.04	-0.002
0.000452	-38.8	0.12	0.004
0.0004528	-40.4	0.04	-0.002
0.0004536	-38.8	0.12	0.004
0.0004544	-40.4	0.04	-0.002
0.0004552	-38.8	0.12	0.004
0.000456	-40.4	0.04	-0.002
0.0004568	-38.8	0.12	0.004
0.0004576	-40.4	0.04	-0.002
0.0004584	-38.8	0.12	0.004
0.0004592	-40.4	0.04	-0.004
0.00046	-38.8	0.12	0.004
0.0004608	-40.4	0.04	-0.002
0.0004616	-38.8	0.12	0.004
0.0004624	-40.4	0.04	-0.002
0.0004632	-38.8	0.12	0.004
0.000464	-40.4	0.04	-0.002
0.0004648	-38.8	0.12	0.004
0.0004656	-40.4	0.04	-0.002
0.0004664	-38	0.12	0.004
0.0004672	-40.4	0.04	-0.002
0.000468	-38	0.12	0.004
0.0004688	-40.4	0.04	-0.002
0.0004696	-38.8	0.16	0.004
0.0004704	-40.4	0.04	-0.002
0.0004712	-38.8	0.12	0.004
0.000472	-40.4	0.04	-0.002
0.0004728	-38.8	0.12	0.004
0.0004736	-40.4	0.04	-0.002
0.0004744	-38.8	0.16	0.004
0.0004752	-40.4	0.04	-0.002
0.000476	-38.8	0.12	0.002
0.0004768	-40.4	0.04	-0.002
0.0004776	-38.8	0.12	0.002
0.0004784	-40.4	0.04	-0.002
0.0004792	-38.8	0.12	0.002
0.00048	-40.4	0.04	-0.002
0.0004808	-38.8	0.12	0.004
0.0004816	-40.4	0.04	-0.002
0.0004824	-38.8	0.12	0.004
0.0004832	-40.4	0.04	-0.002
0.000484	-38.8	0.12	0.004
0.0004848	-40.4	0.04	-0.002
0.0004856	-38.8	0.12	0.004
0.0004864	-40.4	0.04	-0.002
0.0004872	-38.8	0.12	0.002
0.000488	-40.4	0.04	-0.002
0.0004888	-38.8	0.12	0.004
0.0004896	-40.4	0.04	-0.002
0.0004904	-38.8	0.12	0.004
0.0004912	-40.4	0.04	-0.004
0.000492	-38.8	0.12	0.004
0.0004928	-40.4	0.04	-0.002
0.0004936	-38.8	0.12	0.002
0.0004944	-40.4	0.04	-0.004
0.0004952	-38.8	0.12	0.004
0.000496	-40.4	0.04	-0.002
0.0004968	-38.8	0.12	0.004
0.0004976	-40.4	0.04	-0.002
0.0004984	-38.8	0.12	0.004
0.0004992	-40.4	0.04	-0.004
0.0005	-38.8	0.12	0.004
0.0005008	-40.4	0.04	-0.002
0.0005016	-38.8	0.12	0.004
0.0005024	-40.4	0.04	-0.002
0.0005032	-38.8	0.12	0.004
0.000504	-40.4	0.04	-0.002
0.0005048	-38.8	0.12	0.004
0.0005056	-40.4	0.04	-0.002
0.0005064	-38.8	0.12	0.004
0.0005072	-40.4	0.04	-0.002
0.000508	-38.8	0.12	0.004
0.0005088	-40.4	0.04	-0.002
0.0005096	-38.8	0.12	0.004
0.0005104	-40.4	0.04	-0.002
0.0005112	-38.8	0.12	0.004
0.000512	-39.6	0.04	-0.002
0.0005128	-38	0.12	0.004
0.0005136	-40.4	0.04	-0.002
0.0005144	-38.8	0.12	0.004
0.0005152	-39.6	0.04	-0.002
0.000516	-38.8	0.12	0.004
0.0005168	-40.4	0.04	-0.002
0.0005176	-38.8	0.12	0.004
0.0005184	-40.4	0.04	-0.004
0.0005192	-38.8	0.12	0.004
0.00052	-40.4	0.04	-0.002
0.0005208	-38.8	0.12	0.004
0.0005216	-40.4	0.04	-0.002
0.0005224	-38.8	0.12	0.004
0.0005232	-40.4	0.04	-0.002
0.000524	-38.8	0.12	0.004
0.0005248	-40.4	0.04	-0.002
0.0005256	-38	0.12	0.004
0.0005264	-40.4	0.04	-0.002
0.0005272	-38.8	0.12	0.004
0.000528	-40.4	0.04	-0.002
0.0005288	-38	0.12	0.002
0.0005296	-40.4	0.04	-0.002
0.0005304	-38.8	0.12	0.004
0.0005312	-40.4	0.04	-0.002
0.000532	-38.8	0.12	0.002
0.0005328	-40.4	0.04	-0.002
0.0005336	-38.8	0.12	0.004
0.0005344	-39.6	0.04	-0.002
0.0005352	-38.8	0.12	0.004
0.000536	-40.4	0.04	-0.002
0.0005368	-38	0.12	0.004
0.0005376	-40.4	0.04	-0.002
0.0005384	-38.8	0.12	0.004
0.0005392	-40.4	0.04	-0.002
0.00054	-38.8	0.16	0.004
0.0005408	-40.4	0.04	-0.002
0.0005416	-38.8	0.12	0.004
0.0005424	-40.4	0.04	-0.004
0.0005432	-38.8	0.16	0.004
0.000544	-40.4	0.04	-0.002
0.0005448	-38.8	0.12	0.002
0.0005456	-39.6	0.04	-0.002
0.0005464	-38.8	0.12	0.004
0.0005472	-39.6	0.04	-0.002
0.000548	-38.8	0.12	0.004
0.0005488	-39.6	0.04	-0.002
0.0005496	-38.8	0.12	0.002
0.0005504	-40.4	0.04	-0.002
0.0005512	-38.8	0.12	0.004
0.000552	-40.4	0.04	-0.002
0.0005528	-38.8	0.12	0.004
0.0005536	-40.4	0.04	-0.002
0.0005544	-38	0.12	0.004
0.0005552	-40.4	0.04	-0.002
0.000556	-38.8	0.12	0.004
0.0005568	-40.4	0.04	-0.002
0.0005576	-38.8	0.12	0.004
0.0005584	-40.4	0.04	-0.002
0.0005592	-38	0.12	0.004
0.00056	-40.4	0.04	-0.002
0.0005608	-38	0.12	0.004
0.0005616	-40.4	0.04	-0.002
0.0005624	-38	0.12	0.004
0.0005632	-39.6	0.04	-0.002
0.000564	-38	0.12	0.004
0.0005648	-40.4	0.04	-0.002
0.0005656	-38	0.12	0.004
0.0005664	-40.4	0.04	-0.002
0.0005672	-38	0.12	0.004
0.000568	-40.4	0.04	-0.002
0.0005688	-38.8	0.12	0.004
0.0005696	-39.6	0.04	-0.002
0.0005704	-38.8	0.12	0.004
0.0005712	-40.4	0.04	-0.002
0.000572	-38	0.12	0.004
0.0005728	-39.6	0.04	-0.002
0.0005736	-38	0.12	0.004
0.0005744	-39.6	0.04	-0.002
0.0005752	-38	0.12	0.004
0.000576	-40.4	0.04	-0.002
0.0005768	-38	0.16	0.004
0.0005776	-39.6	0.04	-0.004
0.0005784	-38.8	0.12	0.004
0.0005792	-39.6	0.04	-0.004
0.00058	-38	0.12	0.004
0.0005808	-40.4	0.04	-0.002
0.0005816	-38	0.12	0.004
0.0005824	-39.6	0.04	-0.002
0.0005832	-38.8	0.12	0.002
0.000584	-39.6	0.04	-0.004
0.0005848	-38.8	0.16	0.002
0.0005856	-39.6	0.04	-0.004
0.0005864	-38.8	0.12	0.004
0.0005872	-40.4	0.04	-0.002
0.000588	-38	0.12	0.004
0.0005888	-39.6	0.04	-0.002
0.0005896	-38.8	0.12	0.004
0.0005904	-39.6	0.04	-0.004
0.0005912	-38.8	0.12	0.004
0.000592	-39.6	0.04	-0.004
0.0005928	-38	0.12	0.004
0.0005936	-39.6	0.04	-0.004
0.0005944	-38.8	0.12	0.002
0.0005952	-39.6	0.04	-0.004
0.000596	-38.8	0.12	0.002
0.0005968	-40.4	0.04	-0.004
0.0005976	-38.8	0.16	0.002
0.0005984	-39.6	0.04	-0.004
0.0005992	-38.8	0.12	0.002
0.0006	-39.6	0.04	-0.004
0.0006008	-38	0.12	0.004
0.0006016	-39.6	0.04	-0.004
0.0006024	-38.8	0.12	0.002
0.0006032	-39.6	0.04	-0.002
0.000604	-38.8	0.12	0.004
0.0006048	-39.6	0.04	-0.002
0.0006056	-38	0.12	0.004
0.0006064	-39.6	0.04	-0.002
0.0006072	-38	0.12	0.004
0.000608	-39.6	0.04	-0.002
0.0006088	-38	0.12	0.002
0.0006096	-39.6	0.04	-0.004
0.0006104	-38	0.16	0.004
0.0006112	-39.6	0.04	-0.002
0.000612	-38.8	0.12	0.004
0.0006128	-39.6	0.04	-0.002
0.0006136	-38.8	0.12	0.002
0.0006144	-39.6	0.04	-0.002
0.0006152	-38	0.12	0.004
0.000616	-39.6	0.04	-0.002
0.0006168	-38.8	0.12	0.002
0.0006176	-39.6	0.04	-0.002
0.0006184	-38	0.12	0.002
0.0006192	-39.6	0.04	-0.002
0.00062	-38	0.16	0.004
0.0006208	-39.6	0.04	-0.002
0.0006216	-38	0.12	0.004
0.0006224	-39.6	0.04	-0.002
0.0006232	-38	0.12	0.004
0.000624	-39.6	0.04	-0.004
0.0006248	-38	0.12	0.004
0.0006256	-39.6	0.04	-0.002
0.0006264	-38	0.12	0.004
0.0006272	-39.6	0.04	-0.004
0.000628	-38	0.12	0.004
0.0006288	-39.6	0.04	-0.004
0.0006296	-38	0.12	0.002
0.0006304	-39.6	0.04	-0.002
0.0006312	-38	0.12	0.004
0.000632	-39.6	0.04	-0.002
0.0006328	-38	0.12	0.002
0.0006336	-39.6	0.04	-0.002
0.0006344	-38	0.12	0.004
0.0006352	-39.6	0.04	-0.004
0.000636	-38	0.12	0.002
0.0006368	-39.6	0.04	-0.002
0.0006376	-38	0.12	0.002
0.0006384	-39.6	0.04	-0.002
0.0006392	-38	0.12	0.002
0.00064	-39.6	0.04	-0.004
0.0006408	-38	0.12	0.004
0.0006416	-40.4	0.04	-0.004
0.0006424	-38	0.12	0.002
0.0006432	-39.6	0.04	-0.002
0.000644	-38	0.12	0.004
0.0006448	-39.6	0.04	-0.004
0.0006456	-38	0.12	0.004
0.0006464	-39.6	0.04	-0.002
0.0006472	-38	0.12	0.004
0.000648	-39.6	0.04	-0.002
0.0006488	-38	0.12	0.004
0.0006496	-40.4	0.04	-0.002
0.0006504	-38	0.12	0.004
0.0006512	-39.6	0.04	-0.004
0.000652	-38.8	0.16	0.004
0.0006528	-40.4	0.04	-0.004
0.0006536	-38	0.12	0.004
0.0006544	-39.6	0.04	-0.004
0.0006552	-38	0.12	0.002
0.000656	-39.6	0.04	-0.002
0.0006568	-38	0.12	0.004
0.0006576	-39.6	0.04	-0.004
0.0006584	-38	0.12	0.002
0.0006592	-39.6	0.04	-0.002
0.00066	-38	0.12	0.004
0.0006608	-39.6	0.04	-0.002
0.0006616	-38	0.12	0.004
0.0006624	-39.6	0.04	-0.002
0.0006632	-38	0.12	0.004
0.000664	-40.4	0.04	-0.002
0.0006648	-38	0.12	0.004
0.0006656	-39.6	0.04	-0.004
0.0006664	-38	0.12	0.002
0.0006672	-39.6	0.04	-0.004
0.000668	-38.8	0.12	0.002
0.0006688	-40.4	0.04	-0.004
0.0006696	-38	0.12	0.002
0.0006704	-39.6	0.04	-0.002
0.0006712	-38	0.12	0.004
0.000672	-39.6	0.04	-0.002
0.0006728	-38	0.12	0.004
0.0006736	-39.6	0.04	-0.002
0.0006744	-38	0.12	0.004
0.0006752	-39.6	0.04	-0.002
0.000676	-38	0.12	0.004
0.0006768	-39.6	0.04	-0.004
0.0006776	-38	0.12	0.004
0.0006784	-39.6	0.04	-0.002
0.0006792	-38.8	0.12	0.004
0.00068	-39.6	0.04	-0.002
0.0006808	-38	0.12	0.004
0.0006816	-39.6	0.04	-0.002
0.0006824	-38	0.12	0.004
0.0006832	-39.6	0.04	-0.002
0.000684	-38	0.12	0.004
0.0006848	-39.6	0.04	-0.002
0.0006856	-38	0.12	0.004
0.0006864	-39.6	0.04	-0.002
0.0006872	-38	0.12	0.002
0.000688	-39.6	0.04	-0.002
0.0006888	-38	0.12	0.004
0.0006896	-39.6	0.04	-0.002
0.0006904	-38	0.12	0.004
0.0006912	-39.6	0.04	-0.004
0.000692	-38	0.12	0.004
0.0006928	-39.6	0.04	-0.002
0.0006936	-38	0.12	0.002
0.0006944	-39.6	0.04	-0.004
0.0006952	-38	0.12	0.004
0.000696	-39.6	0.04	-0.004
0.0006968	-38	0.12	0.004
0.0006976	-39.6	0.04	-0.002
0.0006984	-38	0.12	0.002
0.0006992	-39.6	0.04	-0.004
0.0007	-38	0.12	0.002
0.0007008	-39.6	0.04	-0.004
0.0007016	-38	0.12	0.004
0.0007024	-39.6	0.04	-0.002
0.0007032	-38	0.12	0.004
0.000704	-39.6	0.04	-0.002
0.0007048	-38	0.12	0.002
0.0007056	-39.6	0.04	-0.004
0.0007064	-38	0.16	0.002
0.0007072	-39.6	0.04	-0.004
0.000708	-38	0.12	0.002
0.0007088	-39.6	0.04	-0.004
0.0007096	-38	0.12	0.002
0.0007104	-39.6	0.04	-0.004
0.0007112	-38	0.12	0.002
0.000712	-39.6	0.04	-0.004
0.0007128	-38	0.12	0.004
0.0007136	-39.6	0.04	-0.002
0.0007144	-38	0.12	0.004
0.0007152	-39.6	0.04	-0.002
0.000716	-38	0.12	0.004
0.0007168	-39.6	0.04	-0.002
0.0007176	-38	0.12	0.004
0.0007184	-39.6	0.04	-0.002
0.0007192	-38	0.12	0.002
0.00072	-39.6	0.04	-0.002
0.0007208	-38	0.12	0.002
0.0007216	-39.6	0.04	-0.002
0.0007224	-38	0.12	0.004
0.0007232	-39.6	0.04	-0.002
0.000724	-38	0.12	0.002
0.0007248	-39.6	0.04	-0.004
0.0007256	-38	0.12	0.002
0.0007264	-39.6	0.04	-0.002
0.0007272	-38	0.12	0.002
0.000728	-40.4	0.04	-0.002
0.0007288	-38	0.12	0.002
0.0007296	-39.6	0.04	-0.002
0.0007304	-38	0.12	0.004
0.0007312	-39.6	0.04	-0.002
0.000732	-38	0.12	0.004
0.0007328	-39.6	0.04	-0.002
0.0007336	-38	0.12	0.004
0.0007344	-39.6	0.04	-0.002
0.0007352	-38	0.12	0.004
0.000736	-39.6	0.04	-0.002
0.0007368	-38	0.12	0.002
0.0007376	-39.6	0.04	-0.002
0.0007384	-38	0.12	0.004
0.0007392	-39.6	0.04	-0.002
0.00074	-38	0.12	0.002
0.0007408	-39.6	0.04	-0.004
0.0007416	-38	0.12	0.004
0.0007424	-39.6	0.04	-0.002
0.0007432	-38	0.12	0.004
0.000744	-39.6	0.04	-0.002
0.0007448	-38	0.12	0.004
0.0007456	-39.6	0.04	-0.002
0.0007464	-38	0.12	0.004
0.0007472	-39.6	0.04	-0.002
0.000748	-38	0.12	0.002
0.0007488	-39.6	0.04	-0.002
0.0007496	-38	0.12	0.002
0.0007504	-39.6	0.04	-0.004
0.0007512	-38	0.12	0.002
0.000752	-39.6	0.04	-0.002
0.0007528	-38	0.12	0.004
0.0007536	-39.6	0.04	-0.002
0.0007544	-38	0.12	0.004
0.0007552	-39.6	0.04	-0.002
0.000756	-38	0.12	0.004
0.0007568	-39.6	0.04	-0.004
0.0007576	-38	0.12	0.004
0.0007584	-39.6	0.04	-0.002
0.0007592	-38	0.12	0.002
0.00076	-39.6	0.04	-0.004
0.0007608	-38	0.12	0.004
0.0007616	-39.6	0.04	-0.002
0.0007624	-38	0.12	0.004
0.0007632	-39.6	0.04	-0.002
0.000764	-38	0.12	0.004
0.0007648	-39.6	0.04	-0.004
0.0007656	-38	0.12	0.002
0.0007664	-39.6	0.04	-0.004
0.0007672	-38	0.12	0.002
0.000768	-39.6	0.04	-0.004
0.0007688	-38	0.12	0.002
0.0007696	-39.6	0.04	-0.004
0.0007704	-38	0.12	0.002
0.0007712	-39.6	0.04	-0.002
0.000772	-38	0.12	0.002
0.0007728	-39.6	0.04	-0.004
0.0007736	-38	0.12	0.002
0.0007744	-39.6	0.04	-0.002
0.0007752	-38	0.12	0.002
0.000776	-39.6	0.04	-0.002
0.0007768	-38	0.12	0.002
0.0007776	-39.6	0.04	-0.002
0.0007784	-38	0.12	0.002
0.0007792	-39.6	0.04	-0.002
0.00078	-38	0.12	0.004
0.0007808	-39.6	0.04	-0.002
0.0007816	-38	0.12	0.004
0.0007824	-39.6	0.04	-0.002
0.0007832	-38	0.12	0.002
0.000784	-39.6	0.04	-0.002
0.0007848	-38	0.12	0.002
0.0007856	-39.6	0.04	-0.004
0.0007864	-38	0.12	0.004
0.0007872	-39.6	0.04	-0.002
0.000788	-38	0.12	0.004
0.0007888	-39.6	0.04	-0.002
0.0007896	-38	0.12	0.004
0.0007904	-39.6	0.04	-0.002
0.0007912	-38	0.12	0.004
0.000792	-39.6	0.04	-0.002
0.0007928	-38	0.12	0.004
0.0007936	-39.6	0.04	-0.002
0.0007944	-38	0.12	0.004
0.0007952	-39.6	0.04	-0.002
0.000796	-38	0.12	0.004
0.0007968	-39.6	0.04	-0.004
0.0007976	-38	0.12	0.004
0.0007984	-39.6	0.04	-0.004
0.0007992	-38	0.12	0.004
0.0008	-39.6	0.04	-0.002
0.0008008	-38	0.12	0.004
0.0008016	-39.6	0.04	-0.002
0.0008024	-38	0.12	0.002
0.0008032	-39.6	0.04	-0.002
0.000804	-38	0.12	0.002
0.0008048	-39.6	0.04	-0.002
0.0008056	-38	0.12	0.004
0.0008064	-39.6	0.04	-0.004
0.0008072	-38	0.12	0.002
0.000808	-39.6	0.04	-0.004
0.0008088	-38	0.12	0.002
0.0008096	-39.6	0.04	-0.004
0.0008104	-38	0.12	0.002
0.0008112	-39.6	0.04	-0.004
0.000812	-38	0.12	0.002
0.0008128	-39.6	0.04	-0.004
0.0008136	-38	0.12	0.002
0.0008144	-39.6	0.04	-0.004
0.0008152	-38	0.12	0.002
0.000816	-39.6	0.04	-0.004
0.0008168	-38	0.12	0.004
0.0008176	-39.6	0.04	-0.004
0.0008184	-38	0.12	0.002
0.0008192	-39.6	0.04	-0.004
0.00082	-38	0.12	0.002
0.0008208	-39.6	0.04	-0.004
0.0008216	-38	0.12	0.004
0.0008224	-39.6	0.04	-0.002
0.0008232	-38	0.12	0.004
0.000824	-39.6	0.04	-0.002
0.0008248	-38	0.12	0.004
0.0008256	-39.6	0.04	-0.002
0.0008264	-38	0.12	0.004
0.0008272	-39.6	0.04	-0.002
0.000828	-38	0.12	0.004
0.0008288	-39.6	0.04	-0.002
0.0008296	-38	0.12	0.004
0.0008304	-39.6	0.04	-0.004
0.0008312	-38	0.12	0.004
0.000832	-39.6	0.04	-0.002
0.0008328	-38	0.12	0.002
0.0008336	-39.6	0.04	-0.004
0.0008344	-38	0.12	0.004
0.0008352	-39.6	0.04	-0.002
0.000836	-38	0.12	0.002
0.0008368	-39.6	0.04	-0.002
0.0008376	-38	0.12	0.002
0.0008384	-39.6	0.04	-0.002
0.0008392	-38	0.12	0.004
0.00084	-39.6	0.04	-0.002
0.0008408	-38	0.12	0.004
0.0008416	-39.6	0.04	-0.002
0.0008424	-38	0.12	0.004
0.0008432	-39.6	0.04	-0.002
0.000844	-38	0.12	0.004
0.0008448	-39.6	0.04	-0.004
0.0008456	-38	0.12	0.004
0.0008464	-39.6	0.04	-0.002
0.0008472	-38	0.12	0.004
0.000848	-39.6	0.04	-0.002
0.0008488	-38	0.12	0.002
0.0008496	-39.6	0.04	-0.004
0.0008504	-38	0.12	0.004
0.0008512	-39.6	0.04	-0.004
0.000852	-38	0.12	0.002
0.0008528	-39.6	0.04	-0.004
0.0008536	-38	0.12	0.002
0.0008544	-39.6	0.04	-0.002
0.0008552	-38	0.12	0.004
0.000856	-39.6	0.04	-0.002
0.0008568	-38	0.12	0.004
0.0008576	-39.6	0.04	-0.002
0.0008584	-38	0.12	0.004
0.0008592	-39.6	0.04	-0.004
0.00086	-38	0.12	0.002
0.0008608	-39.6	0.04	-0.004
0.0008616	-38	0.16	0.002
0.0008624	-39.6	0.04	-0.004
0.0008632	-38	0.12	0.004
0.000864	-39.6	0.04	-0.004
0.0008648	-38	0.12	0.004
0.0008656	-39.6	0.04	-0.004
0.0008664	-38	0.12	0.004
0.0008672	-39.6	0.04	-0.002
0.000868	-38	0.12	0.002
0.0008688	-39.6	0.04	-0.004
0.0008696	-38	0.12	0.002
0.0008704	-39.6	0.04	-0.002
0.0008712	-38	0.12	0.004
0.000872	-39.6	0.04	-0.002
0.0008728	-38	0.12	0.002
0.0008736	-39.6	0.04	-0.002
0.0008744	-38	0.12	0.002
0.0008752	-39.6	0.04	-0.002
0.000876	-38	0.12	0.004
0.0008768	-39.6	0.04	-0.002
0.0008776	-38	0.12	0.004
0.0008784	-39.6	0.04	-0.002
0.0008792	-38	0.16	0.004
0.00088	-39.6	0.04	-0.002
0.0008808	-38	0.12	0.004
0.0008816	-39.6	0.04	-0.002
0.0008824	-38	0.12	0.004
0.0008832	-39.6	0.04	-0.004
0.000884	-38	0.12	0.004
0.0008848	-39.6	0.04	-0.002
0.0008856	-38	0.12	0.004
0.0008864	-39.6	0.04	-0.002
0.0008872	-38	0.12	0.004
0.000888	-39.6	0.04	-0.002
0.0008888	-38	0.12	0.004
0.0008896	-39.6	0.04	-0.002
0.0008904	-38	0.12	0.002
0.0008912	-39.6	0.04	-0.002
0.000892	-38	0.12	0.004
0.0008928	-39.6	0.04	-0.002
0.0008936	-38	0.12	0.004
0.0008944	-39.6	0.04	-0.002
0.0008952	-38	0.12	0.004
0.000896	-39.6	0.04	-0.004
0.0008968	-38	0.12	0.004
0.0008976	-39.6	0.04	-0.004
0.0008984	-38	0.12	0.004
0.0008992	-39.6	0.04	-0.002
0.0009	-38	0.12	0.002
0.0009008	-39.6	0.04	-0.002
0.0009016	-38	0.12	0.002
0.0009024	-39.6	0.04	-0.002
0.0009032	-38	0.12	0.004
0.000904	-39.6	0.04	-0.002
0.0009048	-38	0.12	0.004
0.0009056	-39.6	0.04	-0.004
0.0009064	-38	0.12	0.004
0.0009072	-39.6	0.04	-0.004
0.000908	-38	0.12	0.004
0.0009088	-39.6	0.04	-0.004
0.0009096	-38	0.12	0.002
0.0009104	-39.6	0.04	-0.004
0.0009112	-38	0.12	0.002
0.000912	-39.6	0.04	-0.004
0.0009128	-38	0.12	0.002
0.0009136	-39.6	0.04	-0.002
0.0009144	-38	0.12	0.004
0.0009152	-39.6	0.04	-0.004
0.000916	-38	0.12	0.004
0.0009168	-39.6	0.04	-0.002
0.0009176	-38	0.12	0.004
0.0009184	-39.6	0.04	-0.004
0.0009192	-38	0.12	0.004
0.00092	-39.6	0.04	-0.004
0.0009208	-38	0.12	0.002
0.0009216	-39.6	0.04	-0.002
0.0009224	-38	0.12	0.002
0.0009232	-39.6	0.04	-0.002
0.000924	-38	0.12	0.004
0.0009248	-39.6	0.04	-0.004
0.0009256	-38	0.12	0.004
0.0009264	-39.6	0.04	-0.002
0.0009272	-38	0.12	0.004
0.000928	-39.6	0.04	-0.002
0.0009288	-38	0.12	0.002
0.0009296	-39.6	0.04	-0.002
0.0009304	-38	0.12	0.002
0.0009312	-39.6	0.04	-0.002
0.000932	-38	0.16	0.004
0.0009328	-39.6	0.04	-0.002
0.0009336	-38	0.12	0.004
0.0009344	-39.6	0.04	-0.002
0.0009352	-38	0.12	0.004
0.000936	-39.6	0.04	-0.002
0.0009368	-38	0.12	0.002
0.0009376	-39.6	0.04	-0.002
0.0009384	-38	0.12	0.004
0.0009392	-39.6	0.04	-0.002
0.00094	-38	0.12	0.004
0.0009408	-39.6	0.04	-0.004
0.0009416	-38	0.12	0.004
0.0009424	-39.6	0.04	-0.002
0.0009432	-38	0.12	0.004
0.000944	-39.6	0.04	-0.004
0.0009448	-38	0.12	0.004
0.0009456	-39.6	0.04	-0.002
0.0009464	-38	0.12	0.004
0.0009472	-39.6	0.04	-0.002
0.000948	-38	0.12	0.004
0.0009488	-39.6	0.04	-0.002
0.0009496	-38	0.12	0.004
0.0009504	-39.6	0.04	-0.002
0.0009512	-38	0.12	0.004
0.000952	-39.6	0.04	-0.002
0.0009528	-38	0.12	0.002
0.0009536	-39.6	0.04	-0.002
0.0009544	-38	0.12	0.004
0.0009552	-39.6	0.04	-0.002
0.000956	-38	0.12	0.004
0.0009568	-39.6	0.04	-0.002
0.0009576	-38	0.12	0.004
0.0009584	-39.6	0.04	-0.004
0.0009592	-37.2	0.12	0.002
0.00096	-39.6	0.04	-0.002
0.0009608	-38	0.12	0.004
0.0009616	-39.6	0.04	-0.002
0.0009624	-38	0.12	0.004
0.0009632	-39.6	0.04	-0.002
0.000964	-38	0.12	0.004
0.0009648	-39.6	0.04	-0.002
0.0009656	-38	0.12	0.002
0.0009664	-39.6	0.04	-0.004
0.0009672	-38	0.12	0.002
0.000968	-39.6	0.04	-0.002
0.0009688	-37.2	0.12	0.004
0.0009696	-39.6	0.04	-0.002
0.0009704	-38	0.12	0.004
0.0009712	-39.6	0.04	-0.002
0.000972	-38	0.12	0.004
0.0009728	-39.6	0.04	-0.002
0.0009736	-38	0.12	0.004
0.0009744	-39.6	0.04	-0.004
0.0009752	-38	0.12	0.002
0.000976	-39.6	0.04	-0.002
0.0009768	-38	0.12	0.004
0.0009776	-39.6	0.04	-0.004
0.0009784	-38	0.12	0.004
0.0009792	-39.6	0.04	-0.004
0.00098	-38	0.12	0.002
0.0009808	-39.6	0.04	-0.002
0.0009816	-38	0.12	0.002
0.0009824	-39.6	0.04	-0.004
0.0009832	-37.2	0.12	0.002
0.000984	-39.6	0.04	-0.004
0.0009848	-38	0.12	0.004
0.0009856	-39.6	0.04	-0.002
0.0009864	-38	0.12	0.004
0.0009872	-39.6	0.04	-0.002
0.000988	-37.2	0.12	0.004
0.0009888	-39.6	0.04	-0.002
0.0009896	-38	0.12	0.004
0.0009904	-39.6	0.04	-0.002
0.0009912	-38	0.12	0.002
0.000992	-39.6	0.04	-0.002
0.0009928	-37.2	0.12	0.004
0.0009936	-39.6	0.04	-0.002
0.0009944	-38	0.12	0.004
0.0009952	-39.6	0.04	-0.002
0.000996	-38	0.12	0.004
0.0009968	-39.6	0.04	-0.002
0.0009976	-38	0.12	0.004
0.0009984	-39.6	0.04	-0.002
0.0009992	-38	0.12	0.004
0.001	-39.6	0.04	-0.002
0.001	-37.2	0.12	0.004
0.001	-39.6	0.04	-0.002
0.001	-38	0.12	0.004
0.001	-39.6	0.04	-0.002
0.001	-38	0.12	0.004
0.001	-39.6	0.04	-0.002
0.00101	-38	0.12	0.004
0.00101	-39.6	0.04	-0.002
0.00101	-38	0.12	0.004
0.00101	-39.6	0.04	-0.002
0.00101	-38	0.12	0.004
0.00101	-39.6	0.04	-0.002
0.00101	-38	0.12	0.004
0.00101	-39.6	0.04	-0.002
0.00101	-38	0.12	0.004
0.00101	-39.6	0.04	-0.002
0.00101	-38	0.12	0.004
0.00101	-39.6	0.04	-0.002
0.00102	-38	0.12	0.004
0.00102	-39.6	0.04	-0.002
0.00102	-38	0.12	0.004
0.00102	-39.6	0.04	-0.002
0.00102	-38	0.12	0.004
0.00102	-39.6	0.04	-0.002
0.00102	-38	0.12	0.004
0.00102	-39.6	0.04	-0.002
0.00102	-38	0.12	0.004
0.00102	-39.6	0.04	-0.002
0.00102	-38	0.12	0.004
0.00102	-39.6	0.04	-0.002
0.00102	-38	0.12	0.002
0.00103	-39.6	0.04	-0.002
0.00103	-37.2	0.12	0.004
0.00103	-39.6	0.04	-0.002
0.00103	-38	0.12	0.004
0.00103	-38.8	0.04	-0.002
0.00103	-38	0.12	0.004
0.00103	-38.8	0.04	-0.002
0.00103	-37.2	0.12	0.002
0.00103	-39.6	0.04	-0.002
0.00103	-37.2	0.12	0.002
0.00103	-39.6	0.04	-0.002
0.00103	-38	0.12	0.004
0.00104	-38.8	0.04	-0.004
0.00104	-38	0.12	0.002
0.00104	-39.6	0.04	-0.004
0.00104	-38	0.12	0.002
0.00104	-39.6	0.04	-0.002
0.00104	-37.2	0.12	0.004
0.00104	-39.6	0.04	-0.002
0.00104	-37.2	0.12	0.002
0.00104	-39.6	0.04	-0.002
0.00104	-38	0.12	0.004
0.00104	-39.6	0.04	-0.004
0.00104	-38	0.12	0.004
0.00104	-39.6	0.04	-0.002
0.00105	-38	0.12	0.004
0.00105	-39.6	0.04	-0.002
0.00105	-38	0.12	0.004
0.00105	-39.6	0.04	-0.002
0.00105	-38	0.12	0.004
0.00105	-39.6	0.04	-0.002
0.00105	-37.2	0.12	0.004
0.00105	-39.6	0.04	-0.002
0.00105	-37.2	0.12	0.004
0.00105	-39.6	0.04	-0.002
0.00105	-38	0.12	0.004
0.00105	-39.6	0.04	-0.002
0.00106	-38	0.12	0.004
0.00106	-39.6	0.04	-0.002
0.00106	-38	0.12	0.004
0.00106	-39.6	0.04	-0.002
0.00106	-38	0.12	0.004
0.00106	-39.6	0.04	-0.002
0.00106	-38	0.12	0.004
0.00106	-39.6	0.04	-0.002
0.00106	-38	0.12	0.004
0.00106	-39.6	0.04	-0.002
0.00106	-38	0.12	0.004
0.00106	-39.6	0.04	-0.002
0.00106	-38	0.12	0.004
0.00107	-39.6	0.04	-0.002
0.00107	-38	0.12	0.004
0.00107	-39.6	0.04	-0.002
0.00107	-38	0.12	0.004
0.00107	-38.8	0.04	-0.004
0.00107	-38	0.12	0.004
0.00107	-39.6	0.04	-0.002
0.00107	-38	0.12	0.004
0.00107	-39.6	0.04	-0.002
0.00107	-37.2	0.12	0.004
0.00107	-39.6	0.04	-0.002
0.00107	-38	0.12	0.004
0.00108	-38.8	0.04	-0.002
0.00108	-38	0.12	0.004
0.00108	-39.6	0.04	-0.004
0.00108	-37.2	0.12	0.002
0.00108	-38.8	0.04	-0.002
0.00108	-38	0.12	0.004
0.00108	-38.8	0.04	-0.002
0.00108	-37.2	0.12	0.004
0.00108	-39.6	0.04	-0.002
0.00108	-38	0.12	0.002
0.00108	-39.6	0.04	-0.002
0.00108	-38	0.12	0.004
0.00108	-39.6	0.04	-0.002
0.00109	-37.2	0.12	0.004
0.00109	-39.6	0.04	-0.002
0.00109	-38	0.12	0.004
0.00109	-39.6	0.04	-0.002
0.00109	-38	0.12	0.004
0.00109	-39.6	0.04	-0.002
0.00109	-38	0.12	0.004
0.00109	-38.8	0.04	-0.002
0.00109	-38	0.12	0.004
0.00109	-38.8	0.04	-0.002
0.00109	-37.2	0.12	0.004
0.00109	-39.6	0.04	-0.002
0.0011	-37.2	0.12	0.004
0.0011	-39.6	0.04	-0.002
0.0011	-37.2	0.12	0.004
0.0011	-39.6	0.04	-0.002
0.0011	-38	0.12	0.004
0.0011	-38.8	0.04	-0.002
0.0011	-37.2	0.12	0.004
0.0011	-38.8	0.04	-0.002
0.0011	-37.2	0.12	0.004
0.0011	-39.6	0.04	-0.004
0.0011	-38	0.12	0.004
0.0011	-38.8	0.04	-0.002
0.0011	-38	0.12	0.004
0.00111	-39.6	0.04	-0.002
0.00111	-38	0.12	0.004
0.00111	-39.6	0.04	-0.002
0.00111	-38	0.12	0.004
0.00111	-39.6	0.04	-0.002
0.00111	-37.2	0.12	0.004
0.00111	-38.8	0.04	-0.002
0.00111	-37.2	0.12	0.004
0.00111	-38.8	0.04	-0.002
0.00111	-37.2	0.12	0.004
0.00111	-39.6	0.04	-0.002
0.00111	-37.2	0.12	0.004
0.00112	-39.6	0.04	-0.002
0.00112	-37.2	0.12	0.004
0.00112	-38.8	0.04	-0.002
0.00112	-37.2	0.12	0.004
0.00112	-39.6	0.04	-0.002
0.00112	-37.2	0.12	0.004
0.00112	-38.8	0.04	-0.002
0.00112	-37.2	0.12	0.004
0.00112	-38.8	0.04	-0.002
0.00112	-37.2	0.12	0.004
0.00112	-38.8	0.04	-0.002
0.00112	-38	0.12	0.004
0.00112	-38.8	0.04	-0.002
0.00113	-37.2	0.12	0.004
0.00113	-38.8	0.04	-0.002
0.00113	-38	0.12	0.004
0.00113	-38.8	0.04	-0.002
0.00113	-37.2	0.12	0.004
0.00113	-39.6	0.04	-0.002
0.00113	-37.2	0.12	0.004
0.00113	-38.8	0.04	-0.004
0.00113	-37.2	0.12	0.004
0.00113	-39.6	0.04	-0.002
0.00113	-37.2	0.12	0.004
0.00113	-38.8	0.04	-0.002
0.00114	-37.2	0.12	0.004
0.00114	-39.6	0.04	-0.002
0.00114	-37.2	0.16	0.004
0.00114	-38.8	0.04	-0.002
0.00114	-37.2	0.12	0.004
0.00114	-38.8	0.04	-0.002
0.00114	-38	0.12	0.004
0.00114	-38.8	0.04	-0.002
0.00114	-37.2	0.12	0.004
0.00114	-38.8	0.04	-0.002
0.00114	-37.2	0.12	0.004
0.00114	-38.8	0.04	-0.004
0.00114	-37.2	0.12	0.004
0.00115	-38.8	0.04	-0.002
0.00115	-37.2	0.12	0.004
0.00115	-38.8	0.04	-0.002
0.00115	-37.2	0.12	0.004
0.00115	-38.8	0.04	-0.002
0.00115	-37.2	0.12	0.004
0.00115	-38.8	0.04	-0.002
0.00115	-37.2	0.12	0.004
0.00115	-38.8	0.04	-0.002
0.00115	-37.2	0.12	0.004
0.00115	-38.8	0.04	-0.002
0.00115	-37.2	0.12	0.004
0.00116	-38.8	0.04	-0.002
0.00116	-37.2	0.12	0.004
0.00116	-39.6	0.04	-0.002
0.00116	-37.2	0.12	0.004
0.00116	-38.8	0.04	-0.002
0.00116	-37.2	0.12	0.004
0.00116	-38.8	0.04	-0.002
0.00116	-37.2	0.12	0.004
0.00116	-39.6	0.04	-0.002
0.00116	-37.2	0.16	0.004
0.00116	-38.8	0.04	-0.002
0.00116	-37.2	0.12	0.004
0.00116	-38.8	0.04	-0.002
0.00117	-37.2	0.12	0.004
0.00117	-39.6	0.04	-0.002
0.00117	-37.2	0.12	0.004
0.00117	-39.6	0.04	-0.002
0.00117	-37.2	0.12	0.004
0.00117	-38.8	0.04	-0.002
0.00117	-37.2	0.12	0.004
0.00117	-38.8	0.04	-0.002
0.00117	-37.2	0.12	0.004
0.00117	-38.8	0.04	-0.002
0.00117	-37.2	0.12	0.004
0.00117	-38.8	0.04	-0.002
0.00118	-37.2	0.12	0.004
0.00118	-38.8	0.04	-0.002
0.00118	-37.2	0.12	0.004
0.00118	-38.8	0.04	-0.002
0.00118	-37.2	0.12	0.004
0.00118	-38.8	0.04	-0.002
0.00118	-37.2	0.12	0.004
0.00118	-38.8	0.04	-0.002
0.00118	-37.2	0.12	0.004
0.00118	-38.8	0.04	-0.002
0.00118	-37.2	0.12	0.004
0.00118	-38.8	0.04	-0.002
0.00118	-37.2	0.12	0.004
0.00119	-38.8	0.04	-0.002
0.00119	-37.2	0.12	0.004
0.00119	-38.8	0.04	-0.002
0.00119	-37.2	0.12	0.004
0.00119	-38.8	0.04	-0.002
0.00119	-37.2	0.12	0.004
0.00119	-38.8	0.04	-0.002
0.00119	-37.2	0.12	0.004
0.00119	-38.8	0.04	-0.002
0.00119	-37.2	0.12	0.004
0.00119	-38.8	0.04	-0.002
0.00119	-37.2	0.12	0.004
0.0012	-38.8	0.04	-0.002
0.0012	-37.2	0.12	0.004
0.0012	-38.8	0.04	-0.002
0.0012	-37.2	0.12	0.004
0.0012	-38.8	0.04	-0.004
0.0012	-37.2	0.12	0.004
0.0012	-38.8	0.04	-0.002
0.0012	-37.2	0.12	0.004
0.0012	-38.8	0.04	-0.002
0.0012	-37.2	0.12	0.004
0.0012	-38.8	0.04	-0.002
0.0012	-37.2	0.16	0.004
0.0012	-38.8	0.04	-0.002
0.00121	-37.2	0.12	0.004
0.00121	-38.8	0.04	-0.002
0.00121	-37.2	0.12	0.004
0.00121	-38.8	0.04	-0.002
0.00121	-37.2	0.12	0.004
0.00121	-38.8	0.04	-0.002
0.00121	-37.2	0.12	0.004
0.00121	-38.8	0.04	-0.002
0.00121	-37.2	0.12	0.004
0.00121	-38.8	0.04	-0.002
0.00121	-37.2	0.12	0.004
0.00121	-38.8	0.04	-0.002
0.00122	-37.2	0.12	0.004
0.00122	-38.8	0.04	-0.002
0.00122	-37.2	0.12	0.004
0.00122	-38.8	0.04	-0.002
0.00122	-37.2	0.12	0.004
0.00122	-38.8	0.04	-0.002
0.00122	-37.2	0.12	0.004
0.00122	-38.8	0.04	-0.002
0.00122	-37.2	0.12	0.006
0.00122	-38.8	0.04	-0.002
0.00122	-37.2	0.12	0.004
0.00122	-38.8	0.04	-0.002
0.00122	-37.2	0.12	0.004
0.00123	-38.8	0.04	-0.002
0.00123	-37.2	0.12	0.004
0.00123	-38.8	0.04	-0.002
0.00123	-37.2	0.12	0.004
0.00123	-38.8	0.04	-0.002
0.00123	-37.2	0.12	0.004
0.00123	-38.8	0.04	-0.002
0.00123	-37.2	0.12	0.004
0.00123	-38.8	0.04	-0.002
0.00123	-37.2	0.12	0.004
0.00123	-38.8	0.04	-0.002
0.00123	-37.2	0.12	0.004
0.00124	-38.8	0.04	-0.002
0.00124	-37.2	0.12	0.004
0.00124	-38.8	0.04	-0.002
0.00124	-37.2	0.12	0.004
0.00124	-38.8	0.04	-0.002
0.00124	-37.2	0.12	0.004
0.00124	-38.8	0.04	-0.002
0.00124	-37.2	0.12	0.004
0.00124	-38.8	0.04	-0.002
0.00124	-37.2	0.12	0.004
0.00124	-38.8	0.04	-0.002
0.00124	-37.2	0.12	0.004
0.00124	-38.8	0.04	-0.002
0.00125	-37.2	0.12	0.004
0.00125	-38.8	0.04	-0.002
0.00125	-37.2	0.12	0.004
0.00125	-38.8	0.04	-0.002
0.00125	-37.2	0.12	0.004
0.00125	-38.8	0.04	-0.002
0.00125	-37.2	0.12	0.004
0.00125	-38.8	0.04	-0.002
0.00125	-37.2	0.12	0.004
0.00125	-38.8	0.04	-0.002
0.00125	-37.2	0.12	0.004
0.00125	-38.8	0.04	-0.002
0.00126	-37.2	0.12	0.004
0.00126	-38.8	0.04	-0.002
0.00126	-37.2	0.12	0.004
0.00126	-38.8	0.04	-0.002
0.00126	-37.2	0.12	0.004
0.00126	-38.8	0.04	-0.002
0.00126	-37.2	0.12	0.004
0.00126	-39.6	0.04	-0.002
0.00126	-37.2	0.12	0.004
0.00126	-39.6	0.04	-0.002
0.00126	-37.2	0.12	0.004
0.00126	-38.8	0.04	-0.002
0.00126	-37.2	0.12	0.004
0.00127	-38.8	0.04	-0.002
0.00127	-37.2	0.12	0.004
0.00127	-38.8	0.04	-0.002
0.00127	-37.2	0.12	0.006
0.00127	-38.8	0.04	-0.002
0.00127	-37.2	0.12	0.004
0.00127	-38.8	0.04	-0.002
0.00127	-37.2	0.12	0.004
0.00127	-38.8	0.04	-0.002
0.00127	-37.2	0.12	0.004
0.00127	-38.8	0.04	-0.002
0.00127	-37.2	0.12	0.004
0.00128	-38.8	0.04	-0.002
0.00128	-37.2	0.16	0.004
0.00128	-38.8	0.04	-0.002
0.00128	-37.2	0.12	0.004
0.00128	-38.8	0.04	-0.002
0.00128	-37.2	0.12	0.004
0.00128	-38.8	0.04	-0.002
0.00128	-37.2	0.12	0.004
0.00128	-38.8	0.04	-0.002
0.00128	-37.2	0.12	0.004
0.00128	-38.8	0.04	-0.002
0.00128	-37.2	0.12	0.004
0.00128	-38.8	0.04	-0.002
0.00129	-37.2	0.12	0.004
0.00129	-38.8	0.04	-0.002
0.00129	-37.2	0.12	0.004
0.00129	-38.8	0.04	-0.002
0.00129	-37.2	0.12	0.004
0.00129	-38.8	0.04	-0.002
0.00129	-37.2	0.12	0.004
0.00129	-38.8	0.04	-0.002
0.00129	-37.2	0.12	0.004
0.00129	-38.8	0.04	-0.002
0.00129	-37.2	0.12	0.004
0.00129	-38.8	0.04	-0.002
0.0013	-37.2	0.12	0.004
0.0013	-38.8	0.04	-0.002
0.0013	-37.2	0.12	0.004
0.0013	-38.8	0.04	-0.002
0.0013	-37.2	0.12	0.004
0.0013	-38.8	0.04	-0.002
0.0013	-37.2	0.12	0.004
0.0013	-38.8	0.04	-0.002
0.0013	-37.2	0.12	0.004
0.0013	-38.8	0.04	-0.002
0.0013	-37.2	0.12	0.004
0.0013	-38.8	0.04	-0.002
0.0013	-37.2	0.12	0.004
0.00131	-38.8	0.04	-0.002
0.00131	-37.2	0.12	0.004
0.00131	-38.8	0.04	-0.002
0.00131	-37.2	0.12	0.004
0.00131	-38.8	0.04	-0.002
0.00131	-37.2	0.12	0.004
0.00131	-38.8	0.04	-0.002
0.00131	-37.2	0.12	0.004
0.00131	-38.8	0.04	-0.002
0.00131	-37.2	0.12	0.004
0.00131	-38.8	0.04	-0.002
0.00131	-37.2	0.12	0.004
0.00132	-38.8	0.04	-0.002
0.00132	-37.2	0.12	0.004
0.00132	-38.8	0.04	-0.002
0.00132	-37.2	0.12	0.004
0.00132	-38.8	0.04	-0.002
0.00132	-37.2	0.12	0.004
0.00132	-38.8	0.04	-0.002
0.00132	-37.2	0.12	0.004
0.00132	-38.8	0.04	-0.002
0.00132	-37.2	0.12	0.004
0.00132	-38.8	0.04	-0.002
0.00132	-37.2	0.12	0.004
0.00132	-38.8	0.04	-0.002
0.00133	-37.2	0.12	0.004
0.00133	-38.8	0.04	-0.002
0.00133	-37.2	0.12	0.004
0.00133	-38.8	0.04	-0.002
0.00133	-37.2	0.12	0.004
0.00133	-38.8	0.04	-0.002
0.00133	-37.2	0.12	0.004
0.00133	-38.8	0.04	-0.002
0.00133	-37.2	0.12	0.004
0.00133	-38.8	0.04	-0.002
0.00133	-37.2	0.12	0.004
0.00133	-38.8	0.04	-0.002
0.00134	-37.2	0.12	0.004
0.00134	-38.8	0.04	-0.002
0.00134	-37.2	0.12	0.004
0.00134	-38.8	0.04	-0.002
0.00134	-37.2	0.12	0.004
0.00134	-38.8	0.04	-0.002
0.00134	-37.2	0.12	0.004
0.00134	-38.8	0.04	-0.002
0.00134	-37.2	0.12	0.004
0.00134	-38.8	0.04	-0.002
0.00134	-37.2	0.12	0.004
0.00134	-38.8	0.04	-0.002
0.00134	-37.2	0.12	0.004
0.00135	-38.8	0.04	-0.002
0.00135	-37.2	0.12	0.004
0.00135	-38.8	0.04	-0.002
0.00135	-37.2	0.12	0.004
0.00135	-38.8	0.04	-0.002
0.00135	-37.2	0.12	0.004
0.00135	-38.8	0.04	-0.002
0.00135	-37.2	0.12	0.004
0.00135	-38.8	0.04	-0.002
0.00135	-37.2	0.12	0.006
0.00135	-38.8	0.04	-0.002
0.00135	-37.2	0.12	0.004
0.00136	-38.8	0.04	-0.002
0.00136	-37.2	0.12	0.004
0.00136	-38.8	0.04	-0.002
0.00136	-37.2	0.12	0.004
0.00136	-38.8	0.04	-0.002
0.00136	-37.2	0.12	0.004
0.00136	-38.8	0.04	-0.002
0.00136	-37.2	0.12	0.004
0.00136	-38.8	0.04	-0.002
0.00136	-37.2	0.12	0.004
0.00136	-38.8	0.04	-0.002
0.00136	-37.2	0.12	0.004
0.00136	-38.8	0.04	-0.002
0.00137	-37.2	0.12	0.004
0.00137	-38.8	0.04	-0.002
0.00137	-37.2	0.12	0.004
0.00137	-38.8	0.04	-0.002
0.00137	-37.2	0.12	0.004
0.00137	-38.8	0.04	-0.002
0.00137	-37.2	0.12	0.004
0.00137	-38.8	0.04	-0.002
0.00137	-37.2	0.12	0.004
0.00137	-38.8	0.04	-0.002
0.00137	-37.2	0.12	0.004
0.00137	-38.8	0.04	-0.002
0.00138	-37.2	0.12	0.004
0.00138	-38.8	0.04	-0.002
0.00138	-37.2	0.12	0.004
0.00138	-38.8	0.04	1.90735e-09
0.00138	-37.2	0.12	0.004
0.00138	-38.8	0.04	-0.002
0.00138	-37.2	0.16	0.004
0.00138	-38.8	0.04	-0.002
0.00138	-37.2	0.12	0.004
0.00138	-38.8	0.04	-0.002
0.00138	-37.2	0.12	0.004
0.00138	-38.8	0.04	-0.002
0.00138	-37.2	0.12	0.004
0.00139	-38.8	0.04	-0.002
0.00139	-37.2	0.12	0.004
0.00139	-38.8	0.04	-0.002
0.00139	-37.2	0.12	0.004
0.00139	-38.8	0.04	-0.002
0.00139	-37.2	0.12	0.004
0.00139	-38.8	0.04	-0.002
0.00139	-37.2	0.12	0.004
0.00139	-38.8	0.04	-0.002
0.00139	-37.2	0.12	0.004
0.00139	-38.8	0.04	-0.002
0.00139	-37.2	0.12	0.004
0.0014	-38.8	0.04	-0.002
0.0014	-37.2	0.12	0.004
0.0014	-38.8	0.04	-0.002
0.0014	-37.2	0.12	0.004
0.0014	-38.8	0.04	-0.002
0.0014	-37.2	0.12	0.004
0.0014	-38.8	0.04	-0.002
0.0014	-37.2	0.12	0.004
0.0014	-38.8	0.04	-0.002
0.0014	-37.2	0.12	0.004
0.0014	-38.8	0.04	-0.002
0.0014	-37.2	0.12	0.004
0.0014	-38.8	0.04	-0.002
0.00141	-37.2	0.12	0.004
0.00141	-38.8	0.04	-0.002
0.00141	-37.2	0.12	0.004
0.00141	-38.8	0.04	-0.002
0.00141	-37.2	0.12	0.004
0.00141	-38.8	0.04	-0.002
0.00141	-37.2	0.12	0.004
0.00141	-38.8	0.04	-0.002
0.00141	-37.2	0.12	0.004
0.00141	-38.8	0.04	-0.002
0.00141	-37.2	0.12	0.004
0.00141	-38.8	0.04	-0.002
0.00142	-36.4	0.12	0.006
0.00142	-38.8	0.04	-0.002
0.00142	-37.2	0.12	0.004
0.00142	-38.8	0.04	-0.002
0.00142	-37.2	0.12	0.004
0.00142	-38.8	0.04	-0.002
0.00142	-37.2	0.12	0.004
0.00142	-38.8	0.04	1.90735e-09
0.00142	-37.2	0.12	0.004
0.00142	-38.8	0.04	-0.002
0.00142	-37.2	0.12	0.004
0.00142	-38.8	0.04	-0.002
0.00142	-37.2	0.12	0.004
0.00143	-38.8	0.04	-0.002
0.00143	-37.2	0.12	0.004
0.00143	-38.8	0.04	-0.002
0.00143	-37.2	0.12	0.004
0.00143	-38.8	0.04	1.90735e-09
0.00143	-37.2	0.12	0.004
0.00143	-38.8	0.04	-0.002
0.00143	-37.2	0.12	0.004
0.00143	-38.8	0.04	-0.002
0.00143	-37.2	0.12	0.004
0.00143	-38.8	0.04	-0.002
0.00143	-37.2	0.12	0.004
0.00144	-38.8	0.04	-0.002
0.00144	-37.2	0.12	0.004
0.00144	-38.8	0.04	1.90735e-09
0.00144	-37.2	0.12	0.004
0.00144	-38.8	0.04	-0.002
0.00144	-37.2	0.12	0.004
0.00144	-38.8	0.04	-0.002
0.00144	-37.2	0.12	0.004
0.00144	-38.8	0.04	-0.002
0.00144	-37.2	0.16	0.004
0.00144	-38.8	0.04	-0.002
0.00144	-37.2	0.12	0.004
0.00144	-38.8	0.04	1.90735e-09
0.00145	-37.2	0.12	0.006
0.00145	-38.8	0.04	-0.002
0.00145	-37.2	0.12	0.004
0.00145	-38.8	0.04	-0.002
0.00145	-37.2	0.12	0.004
0.00145	-38.8	0.04	-0.002
0.00145	-37.2	0.12	0.004
0.00145	-38.8	0.04	-0.002
0.00145	-37.2	0.12	0.004
0.00145	-38.8	0.04	-0.002
0.00145	-37.2	0.12	0.004
0.00145	-38.8	0.04	-0.002
0.00146	-36.4	0.12	0.004
0.00146	-38.8	0.04	-0.002
0.00146	-37.2	0.12	0.004
0.00146	-38.8	0.04	-0.002
0.00146	-37.2	0.12	0.004
0.00146	-38.8	0.04	-0.002
0.00146	-37.2	0.12	0.004
0.00146	-38.8	0.04	-0.002
0.00146	-37.2	0.12	0.004
0.00146	-38.8	0.04	-0.002
0.00146	-37.2	0.12	0.004
0.00146	-38.8	0.04	-0.002
0.00146	-37.2	0.12	0.004
0.00147	-38.8	0.04	-0.002
0.00147	-37.2	0.12	0.004
0.00147	-38.8	0.04	-0.002
0.00147	-37.2	0.12	0.004
0.00147	-38.8	0.04	-0.002
0.00147	-37.2	0.12	0.004
0.00147	-38.8	0.04	-0.002
0.00147	-37.2	0.12	0.004
0.00147	-38.8	0.04	-0.002
0.00147	-37.2	0.12	0.004
0.00147	-38.8	0.04	-0.002
0.00147	-37.2	0.12	0.004
0.00148	-38.8	0.04	-0.002
0.00148	-37.2	0.12	0.004
0.00148	-38.8	0.04	-0.002
0.00148	-37.2	0.12	0.004
0.00148	-38.8	0.04	-0.002
0.00148	-37.2	0.12	0.004
0.00148	-38.8	0.04	-0.002
0.00148	-37.2	0.12	0.004
0.00148	-38.8	0.04	-0.002
0.00148	-37.2	0.12	0.004
0.00148	-38.8	0.04	-0.002
0.00148	-37.2	0.12	0.004
0.00148	-38.8	0.04	-0.002
0.00149	-37.2	0.12	0.004
0.00149	-38.8	0.04	1.90735e-09
0.00149	-37.2	0.12	0.004
0.00149	-38.8	0.04	1.90735e-09
0.00149	-37.2	0.12	0.004
0.00149	-38.8	0.04	1.90735e-09
0.00149	-37.2	0.12	0.004
0.00149	-38.8	0.04	-0.002
0.00149	-37.2	0.12	0.004
0.00149	-38.8	0.04	-0.002
0.00149	-37.2	0.12	0.004
0.00149	-38.8	0.04	-0.002
0.0015	-37.2	0.12	0.004
0.0015	-38.8	0.04	-0.002
0.0015	-37.2	0.12	0.004
0.0015	-38.8	0.04	-0.002
0.0015	-37.2	0.12	0.004
0.0015	-38.8	0.04	-0.002
0.0015	-37.2	0.12	0.004
0.0015	-38.8	0.04	-0.002
0.0015	-37.2	0.12	0.004
0.0015	-38.8	0.04	-0.002
0.0015	-37.2	0.12	0.004
0.0015	-38.8	0.04	1.90735e-09
0.0015	-37.2	0.12	0.006
0.00151	-38.8	0.04	-0.002
0.00151	-37.2	0.12	0.006
0.00151	-38.8	0.04	-0.002
0.00151	-37.2	0.12	0.004
0.00151	-38.8	0.04	-0.002
0.00151	-37.2	0.12	0.004
0.00151	-38.8	0.04	-0.002
0.00151	-37.2	0.12	0.004
0.00151	-38.8	0.04	-0.002
0.00151	-37.2	0.12	0.004
0.00151	-38.8	0.04	-0.002
0.00151	-37.2	0.12	0.004
0.00152	-38.8	0.04	-0.002
0.00152	-37.2	0.12	0.004
0.00152	-38.8	0.04	-0.002
0.00152	-37.2	0.12	0.004
0.00152	-38.8	0.04	-0.002
0.00152	-37.2	0.12	0.004
0.00152	-38.8	0.04	-0.002
0.00152	-37.2	0.12	0.004
0.00152	-38.8	0.04	-0.002
0.00152	-37.2	0.12	0.004
0.00152	-38.8	0.04	-0.002
0.00152	-36.4	0.12	0.004
0.00152	-38.8	0.04	-0.002
0.00153	-37.2	0.12	0.004
0.00153	-38	0.04	-0.002
0.00153	-37.2	0.12	0.004
0.00153	-38.8	0.04	-0.002
0.00153	-37.2	0.12	0.004
0.00153	-38.8	0.04	-0.002
0.00153	-37.2	0.12	0.004
0.00153	-38.8	0.04	-0.002
0.00153	-37.2	0.12	0.004
0.00153	-38.8	0.04	-0.002
0.00153	-37.2	0.12	0.004
0.00153	-38.8	0.04	-0.002
0.00154	-37.2	0.12	0.004
0.00154	-38.8	0.04	-0.002
0.00154	-37.2	0.12	0.004
0.00154	-38.8	0.04	-0.002
0.00154	-37.2	0.12	0.004
0.00154	-38.8	0.04	-0.002
0.00154	-37.2	0.12	0.004
0.00154	-38.8	0.04	-0.002
0.00154	-37.2	0.12	0.004
0.00154	-38.8	0.04	-0.002
0.00154	-37.2	0.12	0.004
0.00154	-38.8	0.04	-0.002
0.00154	-37.2	0.12	0.006
0.00155	-38.8	0.04	1.90735e-09
0.00155	-37.2	0.12	0.004
0.00155	-38.8	0.04	-0.002
0.00155	-37.2	0.12	0.004
0.00155	-38.8	0.04	-0.002
0.00155	-37.2	0.12	0.004
0.00155	-38.8	0.04	-0.002
0.00155	-37.2	0.12	0.004
0.00155	-38.8	0.04	-0.002
0.00155	-37.2	0.12	0.004
0.00155	-38.8	0.04	-0.002
0.00155	-37.2	0.12	0.006
0.00156	-38.8	0.04	-0.002
0.00156	-36.4	0.12	0.004
0.00156	-38	0.04	-0.002
0.00156	-37.2	0.12	0.004
0.00156	-38.8	0.04	-0.002
0.00156	-36.4	0.12	0.004
0.00156	-38.8	0.04	-0.002
0.00156	-36.4	0.12	0.004
0.00156	-38.8	0.04	-0.002
0.00156	-37.2	0.12	0.004
0.00156	-38.8	0.04	-0.002
0.00156	-37.2	0.12	0.004
0.00156	-38.8	0.04	-0.002
0.00157	-36.4	0.12	0.004
0.00157	-38.8	0.04	-0.002
0.00157	-37.2	0.12	0.004
0.00157	-38.8	0.04	-0.002
0.00157	-36.4	0.12	0.004
0.00157	-38.8	0.04	-0.002
0.00157	-36.4	0.12	0.004
0.00157	-38	0.04	-0.002
0.00157	-37.2	0.12	0.004
0.00157	-38.8	0.04	-0.002
0.00157	-36.4	0.12	0.004
0.00157	-38	0.04	-0.002
0.00158	-37.2	0.12	0.004
0.00158	-38	0.04	-0.002
0.00158	-36.4	0.12	0.004
0.00158	-38.8	0.04	-0.002
0.00158	-36.4	0.12	0.004
0.00158	-38	0.04	-0.002
0.00158	-37.2	0.12	0.004
0.00158	-38	0.04	-0.002
0.00158	-36.4	0.12	0.004
0.00158	-38.8	0.04	1.90735e-09
0.00158	-36.4	0.12	0.004
0.00158	-38	0.04	-0.002
0.00158	-37.2	0.12	0.004
0.00159	-38.8	0.04	-0.002
0.00159	-36.4	0.12	0.004
0.00159	-38.8	0.04	1.90735e-09
0.00159	-37.2	0.12	0.004
0.00159	-38.8	0.04	-0.002
0.00159	-37.2	0.12	0.004
0.00159	-38.8	0.04	-0.002
0.00159	-36.4	0.12	0.004
0.00159	-38.8	0.04	-0.002
0.00159	-37.2	0.12	0.004
0.00159	-38.8	0.04	-0.002
0.00159	-37.2	0.12	0.004
0.0016	-38.8	0.04	1.90735e-09
0.0016	-36.4	0.12	0.004
0.0016	-38	0.04	-0.002
0.0016	-37.2	0.12	0.004
0.0016	-38	0.04	-0.002
0.0016	-36.4	0.12	0.004
0.0016	-38.8	0.04	-0.002
[truncated: 123,000 more rows]
