# Supplementary material for: Cavity-enhanced photoacoustic sensor based on a whispering-gallery-mode diode laser
Source: Copernicus journal article supplement (doi:10.5194/amt-12-1905-2019), 2019-03-25
Supplement: Supplementary file 1 [file amt-12-1905-2019-supplement.zip › Figure 6.xlsx]

## Sheet: Sheet1
1	43.077	7350.68
2	42.8448	7350.22
3	43.1689	7355.92
4	44.8699	7359.98
5	44.4876	7362.01
6	44.5463	7362.14
7	46.7709	7364.97
8	46.0504	7367
9	45.3064	7369.04
10	44.4319	7369.98
11	43.4392	7372.01
12	44.1626	7372.31
13	44.238	7373.69
14	44.3464	7375.08
15	43.7835	7376.17
16	43.9731	7377.27
17	45.5207	7378.35
18	45.5876	7380.24
19	45.3236	7379.29
20	43.3165	7378.65
21	43.5925	7377.86
22	44.2776	7378.01
23	43.7538	7377.86
24	43.5757	7377.86
25	43.8115	7378.95
26	44.2516	7379.85
27	44.0831	7378.26
28	43.9144	7376.53
29	43.6522	7375.59
30	44.4147	7373.7
31	44.7355	7373.85
32	44.9479	7371.98
33	43.3081	7369.94
34	43.139	7369.94
35	43.9315	7368.99
36	42.9153	7367.9
37	42.7048	7366.97
38	43.0177	7365.87
39	43.0533	7364.14
40	43.3165	7363.19
41	43.5961	7361.62
42	43.8261	7361.27
43	44.8041	7359.6
44	44.2255	7358.34
45	44.3005	7357.08
46	44.2506	7361.73
47	44.0464	7362.34
48	45.5182	7362.79
49	45.8363	7358.13
50	45.8642	7355.98
51	45.8155	7356.1
52	45.6568	7362.6
53	44.971	7361.18
54	45.2568	7360.85
55	44.306	7359.6
56	42.612	7358.34
57	42.6488	7357.08
58	44.4527	7354.57
59	45.4057	7353.31
60	44.8357	7352.85
