# Supplementary material for: Cavity-enhanced photoacoustic sensor based on a whispering-gallery-mode diode laser
Source: Copernicus journal article supplement (doi:10.5194/amt-12-1905-2019), 2019-03-25
Supplement: Supplementary file 1 [file amt-12-1905-2019-supplement.zip › Figure 7(a).xlsx]

## Sheet: Sheet1
1	0.01297
2	0.01152
3	0.00674
4	0.00815
5	0.01066
6	0.01624
7	0.02028
8	0.02361
9	0.02701
10	0.02985
11	0.02162
12	0.02023
13	0.01148
14	0.00853
15	0.01365
16	0.01443
17	0.00556
18	0.00556
19	0.01066
20	0.00745
21	0.01431
22	0.01453
23	0.00853
24	0.00556
25	0.00939
26	0.01365
27	0.01666
28	0.01842
29	0.019
30	0.01719
31	0.01814
32	0.01917
33	0.02083
34	0.02338
35	0.02525
36	0.02619
37	0.02686
38	0.02575
39	0.02392
40	0.02152
41	0.02005
42	0.01418
43	0.0163
44	0.01243
45	0.01152
46	0.01456
47	0.00556
48	0.00973
49	0.00688
50	0.00556
51	0.01456
52	0.01152
53	0.01014
54	0.00191
55	0.00815
56	0.01564
57	0.01431
58	0.02158
59	0.01564
60	0.01964
61	1.54215
62	1.54498
63	1.55853
64	1.5497
65	1.54673
66	1.56296
67	1.55853
68	1.5497
69	1.55128
70	1.55114
71	1.55853
72	1.55196
73	1.56127
74	1.56154
75	1.56074
76	1.5589
77	1.56013
78	1.56151
79	1.5655
80	1.5492
81	1.5442
82	1.55819
83	1.5563
84	1.55099
85	1.5505
86	1.5437
87	1.5445
88	1.5492
89	1.55295
90	1.5442
91	1.54624
92	1.55114
93	1.55853
94	1.54699
95	1.55059
96	1.55295
97	1.55595
98	1.56648
99	1.56849
100	1.54922
101	1.54302
102	1.54114
103	1.54287
104	1.54282
105	1.5407
106	1.54781
107	1.55353
108	1.55274
109	1.55114
110	1.55853
111	1.56136
112	1.56296
113	1.55853
114	1.5497
115	1.55065
116	1.54891
117	1.54886
118	1.54342
119	1.55058
120	1.54152
121	3.09126
122	3.09084
123	3.0857
124	3.08719
125	3.09312
126	3.09568
127	3.0992
128	3.10634
129	3.10945
130	3.11322
131	3.11214
132	3.11053
133	3.11094
134	3.11149
135	3.11082
136	3.10907
137	3.10719
138	3.10705
139	3.10638
140	3.1045
141	3.10072
142	3.096
143	3.09427
144	3.0936
145	3.09388
146	3.09526
147	3.09413
148	3.09384
149	3.09087
150	3.08913
151	3.09035
152	3.09455
153	3.09996
154	3.10431
155	3.10786
156	3.11289
157	3.11422
158	3.11608
159	3.11514
160	3.1131
161	3.10968
162	3.10718
163	3.10469
164	3.10203
165	3.10047
166	3.09987
167	3.09834
168	3.09561
169	3.09178
170	3.08568
171	3.08206
172	3.08388
173	3.08442
174	3.08514
175	3.08905
176	3.0896
177	3.09333
178	3.09688
179	3.10062
180	3.09501
181	4.47139
182	4.47677
183	4.47704
184	4.4819
185	4.48688
186	4.48513
187	4.48203
188	4.47865
189	4.47677
190	4.47828
191	4.48865
192	4.49149
193	4.49403
194	4.48959
195	4.49284
196	4.49786
197	4.49506
198	4.48119
199	4.48393
200	4.48933
201	4.49272
202	4.5066
203	4.48576
204	4.48324
205	4.48542
206	4.4868
207	4.47328
208	4.46556
209	4.47238
210	4.49094
211	4.49623
212	4.4951
213	4.47638
214	4.466
215	4.47621
216	4.47869
217	4.48546
218	4.47182
219	4.46887
220	4.47319
221	4.47038
222	4.47855
223	4.49852
224	4.50161
225	4.5004
226	4.4934
227	4.49558
228	4.49096
229	4.47825
230	4.46881
231	4.4854
232	4.49093
233	4.49445
234	4.48661
235	4.47825
236	4.48177
237	4.48621
238	4.47825
239	4.4846
240	4.47978
241	5.84951
242	5.84748
243	5.84897
244	5.84885
245	5.85156
246	5.85345
247	5.85748
248	5.85663
249	5.86127
250	5.86694
251	5.86788
252	5.87844
253	5.86624
254	5.86352
255	5.86177
256	5.85906
257	5.85635
258	5.85445
259	5.85162
260	5.84878
261	5.84745
262	5.85082
263	5.85312
264	5.85663
265	5.85568
266	5.85474
267	5.85204
268	5.84974
269	5.8484
270	5.84693
271	5.84881
272	5.86056
273	5.86583
274	5.87018
275	5.87359
276	5.84976
277	5.85083
278	5.85217
279	5.85446
280	5.85865
281	5.86093
282	5.86323
283	5.85324
284	5.86983
285	5.86647
286	5.8697
287	5.87106
288	5.87066
289	5.86824
290	5.86504
291	5.86169
292	5.85928
293	5.85702
294	5.85541
295	5.85193
296	5.84909
297	5.85301
298	5.86056
299	5.86583
300	5.87018
301	7.35068
302	7.35022
303	7.35592
304	7.35998
305	7.36201
306	7.36214
307	7.36497
308	7.367
309	7.36904
310	7.36998
311	7.37201
312	7.37231
313	7.37369
314	7.37508
315	7.37617
316	7.37727
317	7.37835
318	7.38024
319	7.37929
320	7.37865
321	7.37786
322	7.37801
323	7.37786
324	7.37786
325	7.37895
326	7.37985
327	7.37826
328	7.37653
329	7.37559
330	7.3737
331	7.37385
332	7.37198
333	7.36994
334	7.36994
335	7.36899
336	7.3679
337	7.36697
338	7.36587
339	7.36414
340	7.36319
341	7.36162
342	7.36127
343	7.3596
344	7.35834
345	7.35708
346	7.36173
347	7.36234
348	7.36279
349	7.35813
350	7.35598
351	7.3561
352	7.3626
353	7.36118
354	7.36085
355	7.3596
356	7.35834
357	7.35708
358	7.35457
359	7.35331
360	7.35285
