# Supplementary material for: Cavity-enhanced photoacoustic sensor based on a whispering-gallery-mode diode laser
Source: Copernicus journal article supplement (doi:10.5194/amt-12-1905-2019), 2019-03-25
Supplement: Supplementary file 1 [file amt-12-1905-2019-supplement.zip › Figure 7(b).xlsx]

## Sheet: Sheet1
0	0.01507
100	1.55228
200	3.09946
300	4.4842
400	5.85822
500	7.36679
